# Supplementary material for: Quantitative Targeted Absolute Proteomics for Better Characterization of an In Vitro Human Blood–Brain Barrier Model Derived from Hematopoietic Stem Cells
Source: MDPI journal article supplement (doi:10.3390/cells11243963), 2022-12-08
Supplement: s1 [file s1]

Article

# Quantitative Targeted Absolute Proteomics for Better Characterization of an In Vitro Human Blood–Brain barrier Model Derived from Hematopoietic Stem Cells

Marie-Pierre Dehouck <sup>1,\*†</sup>, Masanori Tachikawa <sup>2,3,†</sup>, Yutaro Hoshi <sup>3</sup>, Kotaro Omori <sup>3</sup>, Claude-Alain Maurage <sup>4</sup>, Guillaume Strecker <sup>5</sup>, Lucie Dehouck <sup>1</sup>, Marie-Christine Boucau <sup>1</sup>, Yasuo Uchida <sup>3</sup>, Fabien Gosselet <sup>1</sup>, Tetsuya Terasaki <sup>3,6,†</sup> and Yannis Karamanos <sup>1,\*†</sup>

<sup>1</sup> Univ. Artois, UR 2465, Laboratoire de la Barrière Hémato-Encéphalique (LBHE), F-62300 Lens, France

<sup>2</sup> Graduate School of Biomedical Sciences, Tokushima University, 1-78-1 Shomachi, Tokushima 770-8505, Japan

<sup>3</sup> Division of Membrane Transport and Drug Targeting, Graduate School of Pharmaceutical Sciences, Tohoku University, Sendai 980-8577, Japan

<sup>4</sup> Pathology Department, CHRU Lille, 59037 Lille, France

<sup>5</sup> Intensive Care Unit, CHRU Lille, 59037 Lille, France

<sup>6</sup> School of Pharmacy, Faculty of Health Sciences, University of Eastern Finland, FI-70211 Kuopio, Finland

\* Correspondence: mpierre.dehouck@univ-artois.fr (M.-P.D.); yannis.karamanos@univ-artois.fr (Y.K.)

† These authors contributed equally to this work.

## Supplementary Materials

**Figure S1:** Comparison of the average protein expression levels in the isolated human brain microvessels from two donors in this study (hBMV\_NORM), and the previously reported values as the average protein expression levels in the isolated human brain microvessels from seven donors (hBMV\_REF);

**Figure S2:** Comparison of the average protein expression levels in the isolated human brain microvessels from the two donors with no observed pathology (hBMV\_NORM), and those from the two donors with dementia (hBMV\_PATHO);

**Table S1:** Peptide probes to quantify the target molecules;

**Table S2:** Protein expression levels of transporters, receptors, tight junctions/adhesion molecules, plasma membrane-associated molecules, and markers in isolated human brain microvessels from the brain cortices of four independent donors (hBMV1 to hBMV4);

**Supplementary Methods:** The detailed method of quantitative Targeted Absolute Proteomics (qTAP)

**Citation:** Dehouck, M.-P.; Tachikawa, M.; Hoshi, Y.; Omori, K.; Maurage, C.-A.; Strecker, G.; Dehouck, L.; Boucau, M.-C.; Uchida, Y.; Gosselet, F.; et al. Quantitative Targeted Absolute Proteomics for Better Characterization of an In Vitro Human Blood–Brain Barrier Model Derived from Hematopoietic Stem Cells. *Cells* **2022**, *11*, 3963. <https://doi.org/10.3390/cells11243963>

Academic Editor(s): Julia Schumann and Michael Cross

Received: 15 October 2022

Accepted: 5 December 2022

Published: 8 December 2022

**Publisher's Note:** MDPI stays neutral with regard to jurisdictional claims in published maps and institutional affiliations.

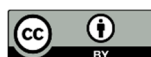

**Copyright:** © 2022 by the authors. Submitted for possible open access publication under the terms and conditions of the Creative Commons Attribution (CC BY) license (<https://creativecommons.org/licenses/by/4.0/>).

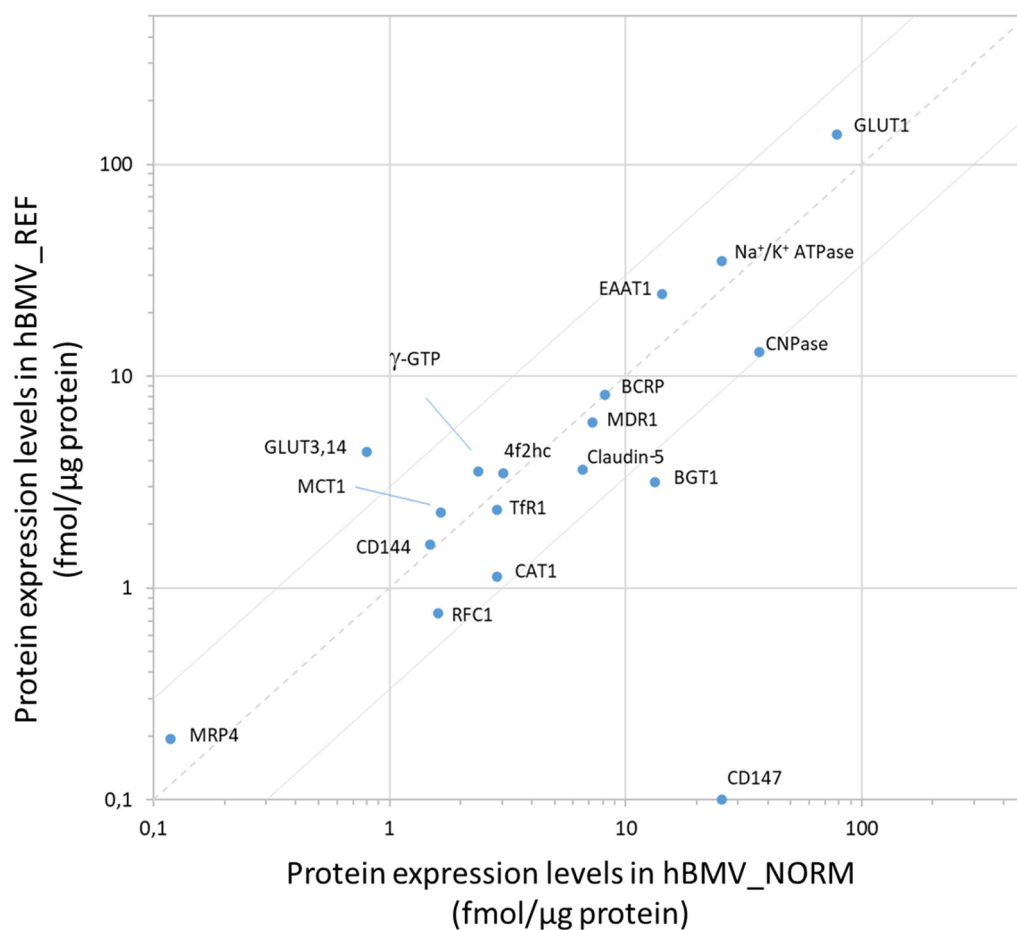

**Supplementary Figure S1** Comparison of the average protein expression levels in the isolated human brain microvessels from two donors in this study (hBMV\_NORM), and the previously reported values as the average protein expression levels in the isolated human brain microvessels from seven donors (hBMV\_REF) [4]. The data set of protein levels obtained in the present study is the average of the values cited in Table 1. The dot line passing through the origin represents the line of identity, and the grey lines represent 3-fold differences.

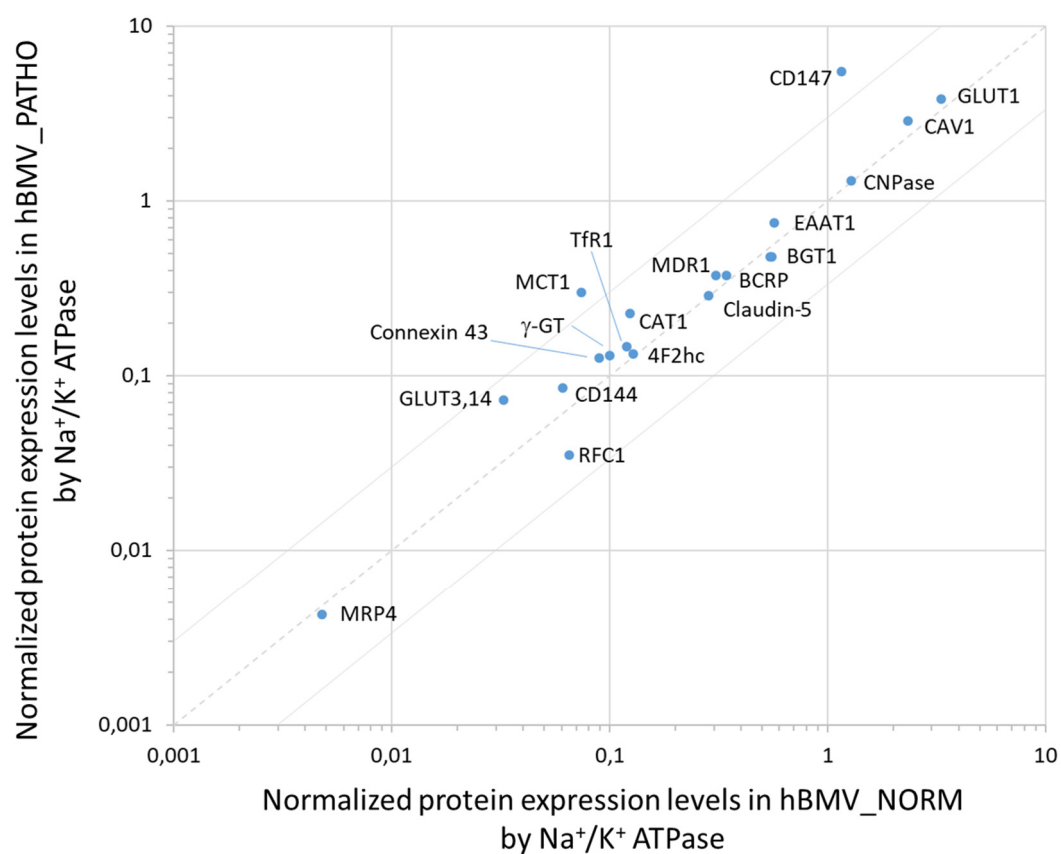

**Supplementary Figure S2** Comparison of the average protein expression levels in the isolated human brain microvessels from the two donors with no observed pathology (hBMV\_NORM), and those from the two donors with dementia (hBMV\_PATHO). The data sets are from the supplementary Table S1. The dot line passing through the origin represents the line of identity, and the grey lines represent 3-fold differences.

**Supplementary Table S1** Peptide probes to quantify the target molecules

| Gene Symbol | Alias       | St or Is | Probe Sequence  | Number of AA | Position of stable isotope-labeled AA from N-terminal | Stable isotope-labeled AA |
|-------------|-------------|----------|-----------------|--------------|-------------------------------------------------------|---------------------------|
| ABCB1       | MDR1        | St       | FYDPLAGK        | 8            |                                                       |                           |
|             |             | Is       | FYDPLAGK        | 8            | 6                                                     | A                         |
| ABCC4       | MRP4        | St       | APVLFFDR        | 8            |                                                       |                           |
|             |             | Is       | APVLFFDR        | 8            | 4                                                     | L                         |
| ABCG2       | BCRP        | St       | SLLDVLAAR       | 10           |                                                       |                           |
|             |             | Is       | SLLDVLAAR       | 10           | 7                                                     | L                         |
| SLC1A3      | EAAT1       | St       | VTAADAFLDLIR    | 12           |                                                       |                           |
|             |             | Is       | VTAADAFLDLIR    | 12           | 11                                                    | I                         |
| SLC2A1      | GLUT1       | St       | TFDEIASGFR      | 10           |                                                       |                           |
|             |             | Is       | TFDEIASGFR      | 10           | 6                                                     | A                         |
| SLC2A3,14   | GLUT3,14    | St       | QVTVLELFR       | 9            |                                                       |                           |
|             |             | Is       | QVTVLELFR       | 9            | 8                                                     | F                         |
| SLC3A2      | 4F2hc       | St       | ADLLLSTQPGR     | 11           |                                                       |                           |
|             |             | Is       | ADLLLSTQPGR     | 11           | 9                                                     | P                         |
| SLC6A12     | BGT1        | St       | NFGPSPTR        | 8            |                                                       |                           |
|             |             | Is       | NFGPSPTR        | 8            | 6                                                     | P                         |
| SLC7A1      | CAT1        | St       | FLANVNDR        | 8            |                                                       |                           |
|             |             | Is       | FLANVNDR        | 8            | 5                                                     | V                         |
| SLC16A1     | MCT1        | St       | SITVFFK         | 7            |                                                       |                           |
|             |             | Is       | SITVFFK         | 7            | 6                                                     | F                         |
| SLC19A1     | RFC1        | St       | QPPAQGLR        | 8            |                                                       |                           |
|             |             | Is       | QPPAQGLR        | 8            | 7                                                     | L                         |
|             | TfR1        | St       | SGVGTALLK       | 10           |                                                       |                           |
|             |             | Is       | SGVGTALLK       | 10           | 9                                                     | L                         |
|             | FcRn        | St       | GNLEWK          | 6            |                                                       |                           |
|             |             | Is       | GNLEWK          | 6            | 6                                                     | K                         |
|             | Claudin-5   | St       | EFYDPSVPVSQK    | 12           |                                                       |                           |
|             |             | Is       | EFYDPSVPVSQK    | 12           | 9                                                     | V                         |
|             | CD144       | St       | YTFVVPEDTR      | 10           |                                                       |                           |
|             |             | Is       | YTFVVPEDTR      | 10           | 6                                                     | P                         |
|             | CD147       | St       | EDALPGQK        | 8            |                                                       |                           |
|             |             | Is       | EDALPGQK        | 8            | 5                                                     | P                         |
|             | Caveolin-1  | St       | HLNDDVVK        | 8            |                                                       |                           |
|             |             | Is       | HLNDDVVK        | 8            | 8                                                     | K                         |
|             | Connexin 43 | St       | SDPYHATSGALSPAK | 15           |                                                       |                           |

|                                 |                                 |    |                   |    |    |   |
|---------------------------------|---------------------------------|----|-------------------|----|----|---|
|                                 |                                 | Is | SDPYHATSGALSPAK   | 15 | 15 | K |
|                                 | Annexin A6                      | St | ALIEILATR         | 9  |    |   |
|                                 |                                 | Is | ALIEILATR         | 9  | 9  | R |
|                                 | Ezrin                           | St | FYPEDVAEELIQDITQK | 17 |    |   |
|                                 |                                 | Is | FYPEDVAEELIQDITQK | 17 | 17 | K |
|                                 | Radixin                         | St | GYSTWLK           | 7  |    |   |
|                                 |                                 | Is | GYSTWLK           | 7  | 7  | K |
|                                 | Moesin                          | St | GFSTWLK           | 7  |    |   |
|                                 |                                 | Is | GFSTWLK           | 7  | 7  | K |
|                                 | gamma-GTP                       | St | LFQPSIQLAR        | 10 |    |   |
|                                 |                                 | Is | LFQPSIQLAR        | 10 | 8  | L |
|                                 | GFAP                            | St | FASYIEK           | 7  |    |   |
|                                 |                                 | Is | FASYIEK           | 7  | 5  | I |
|                                 | CNPase                          | St | LSPTDNLPR         | 9  |    |   |
|                                 |                                 | Is | LSPTDNLPR         | 9  | 8  | P |
| Na <sup>+</sup> /K <sup>+</sup> | Na <sup>+</sup> /K <sup>+</sup> |    |                   |    |    |   |
| ATPase (α1, α2, α3 sub-units)   | ATPase (α1, α2, α3 sub-units)   | St | AAVPDAVGK         | 9  |    |   |
|                                 |                                 | Is | AAVPDAVGK         | 9  | 7  | V |

<sup>13</sup>C and <sup>15</sup>N were used for amino acid labeling in the internal standard peptides (stable isotope-labeled peptides). The amino acid sequence of probe peptide is specific for the target molecule. AA, amino acid; St, standard; Is, internal standard.

**Supplementary Table S2.** Protein expression levels of transporters, receptors, tight junctions/adhesion molecules, plasma membrane-associated molecules, and markers in isolated human brain microvessels from the brain cortexes of two independent donors with no pathology (hBMV1 and hBMV2), and two independent donors with dementia (hBMV3 and hBMV4)

| Protein expression levels         |                    |                         |                    |                         |                    |                         |                    |                         |
|-----------------------------------|--------------------|-------------------------|--------------------|-------------------------|--------------------|-------------------------|--------------------|-------------------------|
| Protein name/<br><i>Gene name</i> | hBMV1              |                         | hBMV2              |                         | hBMV3              |                         | hBMV4              |                         |
|                                   | Whole cell lysate  |                         | Whole cell lysate  |                         | Whole cell lysate  |                         | Whole cell lysate  |                         |
|                                   | Value <sup>a</sup> | Normalized <sup>b</sup> |
|                                   | (fmol/μg           |                         | (fmol/μg           |                         | (fmol/μg           |                         | (fmol/μg           |                         |
|                                   | protein)           |                         | protein)           |                         | protein)           |                         | protein)           |                         |
| <i>Transporters or Receptors</i>  |                    |                         |                    |                         |                    |                         |                    |                         |
| MDR1/ABCB1                        | 5.42 ± 0.41        | 0.181                   | 9.06 ± 0.40        | 0.431                   | 3.86 ± 0.10        | 0.271                   | 7.02 ± 0.19        | 0.336                   |
| MRP4/ABCC4                        | 0.117*             | 0.004                   | 0.118*             | 0.006                   | 0.011**            | 0.001                   | 0.133 ± 0.011      | 0.008                   |
| BCRP/ABCG2                        | 6.42 ± 0.34        | 0.214                   | 9.88 ± 0.23        | 0.470                   | 3.74 ± 0.07        | 0.341                   | 7.14 ± 0.16        | 0.403                   |
| EAAT1/SLC1A3                      | 15.0 ± 0.6         | 0.500                   | 13.4 ± 0.3         | 0.638                   | 8.88 ± 0.35        | 0.811                   | 12.0 ± 0.2         | 0.677                   |
| GLUT1/SLC2A1                      | 61.9 ± 2.1         | 2.063                   | 95.2 ± 2.3         | 4.533                   | 40.2 ± 0.9         | 3.673                   | 70.2 ± 0.5         | 3.965                   |
| BGT1/SLC6A12                      | 11.7 ± 0.4         | 0.390                   | 15.0 ± 0.4         | 0.714                   | 5.72 ± 0.26        | 0.523                   | 7.73 ± 0.36        | 0.436                   |
| GLUT3,14/ SLC2A3,14               | 0.765 ± 0.043      | 0.025                   | 0.833 ± 0.049      | 0.040                   | 0.713 ± 0.062      | 0.065                   | 1.41 ± 0.07        | 0.079                   |
| CAT1/SLC7A1                       | 1.60 ± 0.25        | 0.053                   | 4.04 ± 0.42        | 0.192                   | 1.85 ± 0.23        | 0.169                   | 5.02 ± 0.24        | 0.283                   |
| MCT1/SLC16A1                      | 0.507*             | 0.017                   | 2.76 ± 0.37        | 0.131                   | 4.93 ± 0.22        | 0.451                   | 2.59 ± 0.20        | 0.146                   |
| RFC1/SLC19A1                      | 1.51 ± 0.22        | 0.050                   | 1.68 ± 0.20        | 0.080                   | 0.334**            | 0.031                   | 0.696**            | 0.039*                  |
| TfR1/TFRC                         | 2.22 ± 0.39        | 0.074                   | 3.46 ± 0.08        | 0.165                   | 1.80 ± 0.05        | 0.165                   | 2.29 ± 0.16        | 0.129                   |
| FcRn/FCGRT                        | N.D.               | -                       | N.D.               | -                       | N.D.               | -                       | N.D.               | -                       |
| <i>Others</i>                     |                    |                         |                    |                         |                    |                         |                    |                         |
| Claudin-5/CLDN5                   | 4.08 ± 0.51        | 0.136                   | 9.03 ± 0.66        | 0.430                   | 3.28 ± 0.13        | 0.300                   | 4.82 ± 0.08        | 0.272                   |
| CD144/CDH5                        | 1.34 ± 0.25        | 0.045                   | 1.60 ± 0.08        | 0.076                   | 0.837 ± 0.080      | 0.076                   | 1.66 ± 0.06        | 0.094                   |

|                                        |             |       |             |       |             |       |             |       |
|----------------------------------------|-------------|-------|-------------|-------|-------------|-------|-------------|-------|
| 4F2hc/SLC3A2                           | 2.41 ± 0.10 | 0.080 | 3.67 ± 0.06 | 0.175 | 1.13 ± 0.09 | 0.103 | 2.89 ± 0.04 | 0.163 |
| CD147/BSG                              | 9.45 ± 0.92 | 0.315 | 41.8 ± 0.7  | 1.990 | 97.9 ± 0.47 | 8.943 | 34.9 ± 1.5  | 1.971 |
| Caveolin-1/CAV1                        | 40.6 ± 0.9  | 1.354 | 69.4 ± 0.4  | 3.311 | 34.6 ± 0.2  | 3.160 | 45.6 ± 1.1  | 2.574 |
| Connexin 43/CX43                       | 1.64**      | 0.055 | 2.58 ± 0.25 | 0.123 | 1.63**      | 0.149 | 1.84 ± 0.07 | 0.104 |
| Annexin A6/ANXA6                       | 8.98 ± 0.14 | 0.299 | 16.6 ± 0.7  | 0.790 | 7.02 ± 0.61 | 0.641 | 5.62 ± 0.37 | 0.317 |
| Ezrin/EZR                              | N.D.        | -     | N.D.        | -     | N.D.        | -     | N.D.        | -     |
| Radixin/RDX                            | N.D.        | -     | N.D.        | -     | N.D.        | -     | N.D.        | -     |
| Moesin/MSN                             | N.D.        | -     | N.D.        | -     | N.D.        | -     | N.D.        | -     |
| <i>Markers proteins</i>                |             |       |             |       |             |       |             |       |
| γ-GTP/GGT                              | 1.81 ± 0.08 | 0.060 | 2.92 ± 0.20 | 0.139 | 1.67 ± 0.08 | .152  | 1.93 ± 0.18 | .109  |
| GFAP/GFAP                              | 7.27 ± 0.69 | 0.242 | 3.33 ± 0.93 | 0.158 | 11.1 ± 0.5  | 1.02  | 11.3 ± 0.9  | 0.638 |
| CNPase/CNP                             | 65.9 ± 1.3  | 2.20  | 7.81 ± 0.06 | 0.371 | 15.4 ± 0.2  | 1.41  | 20.9 ± 0.7  | 1.18  |
| Na <sup>+</sup> /K <sup>+</sup> ATPase | 30.0 ± 0.9  | 1     | 21.0 ± 0.2  | 1     | 10.9 ± 0.2  | 1     | 17.7 ± 0.3  | 1     |

<sup>a</sup> Each quantitative value, except for the values marked by asterisks, represents the mean ± S.E.M. of the quantitative values determined from three to five MS/MS transitions in one analysis. A single asterisk represents the mean of quantitative values obtained from two transitions. Double asterisks represent the quantitative value obtained from one transition. The reliability of the protein expression values calculated from one or two transition(s) is lower than that of values obtained from three to five transitions. U.L.Q. represents under the limit of quantification and the detection limit of quantification was indicated as the value of detection limit. N.D. represents no data available.

<sup>b</sup> values normalized by the quadratic mean of Na<sup>+</sup>/K<sup>+</sup> ATPase

**Supplementary Methods:** The detailed method of quantitative Targeted Absolute Proteomics (qTAP)**1. Lysyl endopeptidase and trypsin digestion.**

The whole cell lysate and crude membrane fraction were suspended in denaturing buffer (7 M guanidine hydrochloride, 500 mM Tris-HCl (pH 8.5) and 10 mM EDTA) to solubilize and denature proteins, and then treated with dithiothreitol at room temperature for 60 min followed by iodoacetamide at room temperature for 60 min in darkness to reduce and alkylate the proteins. The proteins were then purified by a methanol-chloroform precipitation method. The resultant precipitates were dissolved in urea buffer (6 M urea and 100 mM Tris-HCl (pH 8.5)), diluted fivefold with 100 mM Tris-HCl (pH 8.5), and sonicated in an ultrasonic bath containing ice to ensure complete dissolution. ProteaseMax surfactant (Promega, Madison, Wisconsin) and lysyl endopeptidase (LysC; Wako Pure Chemical Industries, Osaka, Japan) were added at 0.05% final concentration and an enzyme/substrate ratio of 1:100, respectively, and the mixture was incubated at room temperature for 3 h, followed by digestion with TPCK-treated trypsin (Promega) at an enzyme/substrate ratio of 1:100 at 37°C for 16 h. The resulting peptide samples were acidified with trifluoroacetic acid.

**2. Clean-up of peptide samples for LC-MS/MS analysis.**

For the calibration curve, tryptic digests were obtained from 10 µg protein of *E. coli* lysate and spiked with standard peptides (0, 1, 2.5, 5, 10, 25, 50, 100, 500, 1000, or 2000 fmol for the points of 0, 0.1, 0.25, 0.5, 1, 2.5, 5, 10, 50, 100, or 200 fmol/µg protein, respectively) and 500 fmol of internal standard peptides. The internal standard peptide had an identical amino acid sequence to that of the corresponding standard peptide, and one amino acid residue of each internal standard was labeled with stable isotopes (<sup>13</sup>C and <sup>15</sup>N) (Supplementary Table S1). For the whole cell lysate and crude membrane fraction, the tryptic digests obtained from 10 µg protein of plasma membrane fractions were spiked with 500 fmol of internal standard peptides. All samples were cleaned up by using GL-tip GC and SDB (GL Science Inc., Tokyo, Japan), according to the manufacturer's protocol. The resultant eluates were evaporated by centrifugation under vacuum for 1 h with a CC-105 centrifugal concentrator (low heat mode; TOMY, Tokyo, Japan), and the residues were reconstituted in 0.1% formic acid/water. One-tenth volume was injected into the LC-MS/MS system: on the assumption that there was no loss of peptides during the clean-up, each injection for the calibration curve included 0, 0.1, 0.25, 0.5, 1, 2.5, 5, 10, 50, 100, or 200 fmol of standard peptides, 50 fmol of internal standard peptides and tryptic digest equivalent to 1 µg protein of *E. coli* lysate, and each injection for the whole cell lysate and crude membrane fraction samples included 50 fmol of internal standard peptides and tryptic digest equivalent to 1 µg protein of whole cell lysate and crude membrane fraction samples. The reason why we used *E. coli* digests for the calibration curve is to minimize the adsorption of the standard and internal standard peptides on the walls of tubes and pipette-tips; it is important to avoid loss of peptides while preparing the dilution series because of the quite low concentrations.

**3. Multiplexed selected/multiple reaction monitoring (SRM/MRM) in nanoLC-TripleTOF5600 system.**

The LC-MS/MS system consisted of a NanoLC-Ultra 2Dplus system (Eksigent Technologies, Dublin, CA, USA) coupled with a cHiPLC-nanoflex system (Eksigent Technologies) and a TripleTOF5600 (AB SCIEX, Framingham, MA, USA) equipped with a NanoSpray III ion source (AB SCIEX). Mobile phases A and B consisted of 0.1% formic acid in water and 0.1% formic acid in acetonitrile, respectively. The cleaned-up peptide samples were directly loaded onto a Nano cHiPLC 75 µm × 15 cm ReproSil-Pur C18-AQ 3 µm 120Å column (Eksigent Technologies) with injection amounts corresponding to 1 µg protein as described above, without a trap column. The peptides were separated and eluted from the column at a flow rate of 300 nL/min with a linear gradient as follows (mobile phase A:B): 100:0 for 40 min after injection for sample loading, 60:40 at 40 min, 10:90 at 41 min and up to 50 min, 98:2 at 50.1 min and up to 80 min. The eluted peptides were sprayed from a SilicaTip emitter (New Objective, Woburn, MA, USA) and positively ionized with the NanoSpray III ion source of the TripleTOF5600. The source/gas parameters were as follows: ion source gas 1 (20 psi), curtain gas (20 psi), ion spray voltage, floating (2300 V), interface heater temperature (150°C). Measurements of unlabeled and stable-isotope labeled peptides were acquired in the MRM-High Resolution (MRM-HR) mode, known as Parallel Reaction Monitoring (PRM) in the TripleTOF5600. The declustering potential was 80 V. The collision energy was optimized for each peptide. The collision energy spread was 0 V. The product ions were scanned with a MS/MS range of 100 to 1600 m/z. The accumulation time was 0.05 second for each target peptide. Auto calibration with β-galactosidase was performed every 4 runs.



MultiQuant software (AB SCIEX) was used for data analysis. The SRM/MRM transitions for each peptide consisted of the  $m/z$  value of the precursor ion and the  $m/z$  range of  $m/z \pm 0.025$  for several product ions. A peak was defined as positive when the signal-to-noise (S/N) ratio of peak intensity and the peak area were higher than 3 and 1000 counts, respectively, for the signal peaks detected at the same retention times as those of the internal standard peptides. When positive peaks were observed in one to five SRM/MRM transitions, we considered that the protein was expressed in the samples, and its protein expression level was calculated as described below.

#### 4. Calculation of protein expression levels.

For each measurement, the target peptide was considered to exist in the sample if positive peaks were observed in one to five SRM/MRM transitions, and then the amount (fmol) of the target peptide was calculated from the peak area ratio (target peptide / the corresponding internal standard peptide) and calibration curve for each transition showing a positive peak. Subsequently, the protein expression level (fmol/ $\mu$ g protein) of the corresponding target protein in the whole cell lysate and crude membrane fraction samples was calculated for each transition by dividing the amount (fmol) of the target peptide by the total protein amount of whole cell lysate and crude membrane fraction samples examined (1  $\mu$ g protein). Therefore, in one measurement, one to five values of protein expression level were obtained for each protein, and the average was calculated.

#### 5. Calculation of the limit of quantification.

If no positive peak was observed, the protein expression level was defined as under the limit of quantification (ULQ). The LQ calculation was as follows: The peak area (counts) which gives the S/N ratio of 3 for peak intensity in the sample ( $PA_{S/N3, sample}$ ) was calculated by means of eqn 1 from the intensity (cps) of background noise ( $I_{noise}$ ), and the peak area (counts) and intensity (cps) of internal standard peptide in the sample ( $PA_{IS, sample}$  and  $PI_{IS, sample}$ , respectively). When  $PA_{S/N3, sample}$  was more than 1000 counts,  $PA_{S/N3, sample}$  was used as the peak area for the calculation of LQ ( $PA_{LQ}$ ). In contrast, when  $PA_{S/N3, sample}$  was less than 1000 counts, 1000 counts was used as  $PA_{LQ}$ . When the calibration curve was obtained with eqn 2, the amount (fmol) of target protein equivalent to LQ ( $A_{Target eq LQ}$ ) was calculated by means of eqn 3 from  $PA_{LQ}$ ,  $PA_{IS, sample}$  and the values of slope and intercept in eqn 2. Then, LQ was obtained with eqn 4 by dividing  $A_{Target eq LQ}$  by the total protein amount of sample examined ( $A_{sample}$ , 1  $\mu$ g protein).

$$PA_{S/N3, sample} = I_{noise} \times 3 \times PA_{IS, sample} / PI_{IS, sample} \quad (1)$$

$$PA_{ST, Authentic} / PA_{IS, Authentic} = (Slope \times A_{ST, Authentic} + Intercept) \quad (2)$$

$$A_{Target eq LQ} = (PA_{LQ} / PA_{IS, sample} - Intercept) / Slope \quad (3)$$

$$LQ = A_{Target eq LQ} / A_{sample} \quad (4)$$

where  $PA_{ST, Authentic}$  and  $PA_{IS, Authentic}$  are the peak areas (counts) of standard peptide and internal standard peptide in authentic samples, respectively, and  $A_{ST, Authentic}$  is the amount (fmol) of standard peptide in authentic samples.
